# Supplementary material for: Analysis of Circulating Tumor Cells in Patients with Non-Metastatic High-Risk Prostate Cancer before and after Radiotherapy Using Three Different Enumeration Assays
Source: PubMed Central journal article supplement (PMC6627099; doi:10.3390/cancers11060802), 2019-06-10
Supplement: cancers-11-00802-s001.pdf [file cancers-11-00802-s001.pdf]

## Supplementary Materials: Analysis of Circulating Tumor Cells in Patients with Non-Metastatic High-Risk Prostate Cancer before and after Radiotherapy Using Three Different Enumeration Assays

Joanna Budna-Tukan , Monika Świerczewska, Martine Mazel, Wojciech A. Cieślowski, Agnieszka Ida, Agnieszka Jankowiak, Andrzej Antczak, Michał Nowicki, Klaus Pantel, David Azria, Maciej Zabel and Catherine Alix-Panabières

**Table S1.** Blood sampling dates, endocrine therapy and treatment duration.

| Patients | Date of Inclusion | Radiotherapy (RT) |            | Samples    |            |                                  | Endocrine Therapy (ET)                          |                    |                                       |             |
|----------|-------------------|-------------------|------------|------------|------------|----------------------------------|-------------------------------------------------|--------------------|---------------------------------------|-------------|
|          |                   | Start RT          | End RT     | Sample n°1 | Sample n°2 | Days between the Two Blood Draws | Name                                            | Date of Initiation | Duration (Months)                     | Situation   |
| 1        | 2014-08-05        | 2014-09-17        | 2014-11-12 | 2014-08-05 | 2014-12-09 | 126                              | Enantone 11.25 mg                               | 2014-08-07         | 18                                    | Concomitant |
| 2        | 2014-08-05        | Not done          | Not done   | 2014-08-05 | N/A        | N/A                              | LH-RH agonist                                   | Unknown            | 36                                    | N/A         |
| 3        | 2014-08-19        | 2014-09-17        | 2014-11-06 | 2014-08-19 | 2014-12-16 | 119                              | Enantone 30 mg                                  | 2014-08-19         | 24                                    | Concomitant |
| 4        | 2014-11-19        | 2014-12-04        | 2015-01-28 | 2014-11-19 | 2015-03-11 | 112                              | Decapeptyl 22.5 mg                              | 2014-11-19         | 24                                    | Concomitant |
| 5        | 2015-01-06        | 2015-01-19        | 2015-03-10 | 2015-01-07 | 2015-04-23 | 106                              | Enantone 30 mg                                  | 2015-01-07         | 24                                    | Concomitant |
| 6        | 2015-01-06        | 2015-01-15        | 2015-03-05 | 2015-01-07 | 2015-04-22 | 105                              | Casodex 50 mg<br>Enantone 30 mg                 | 2015-01-07         | 12                                    | Concomitant |
| 7        | 2015-01-13        | 2015-02-02        | 2015-03-25 | 2015-01-14 | 2015-06-03 | 140                              | Decapeptyl 22.5 mg                              | 2015-01-14         | 36                                    | Concomitant |
| 8        | 2015-03-19        | 2015-04-07        | 2015-06-04 | 2015-03-25 | 2015-07-08 | 105                              | Casodex 50 mg<br>Decapeptyl 22.5 mg             | 2015-03-25         | 18                                    | Concomitant |
| 9        | 2015-03-25        | 2015-04-08        | 2015-06-08 | 2015-03-25 | 2015-06-08 | 75                               | Enantone 30 mg                                  | 2015-03-25         | 12                                    | Concomitant |
| 10       | 2015-04-08        | 2015-04-22        | 2015-06-19 | 2015-04-08 | 2015-07-22 | 105                              | Enantone 30 mg                                  | 2015-04-08         | 36                                    | Concomitant |
| 11       | 2015-05-26        | 2015-06-09        | 2015-07-31 | 2015-05-27 | 2015-09-16 | 112                              | Enantone 30 mg                                  | 2015-05-27         | 18                                    | Concomitant |
| 12       | 2015-06-24        | 2015-07-15        | 2015-09-04 | 2015-06-24 | 2015-10-14 | 112                              | Casodex 50 mg<br>Decapeptyl 22.5 mg             | 2015-06-24         | 24                                    | Concomitant |
| 13       | 2015-09-08        | 2015-12-03        | 2016-01-28 | 2015-09-25 | 2016-03-03 | 160                              | Enantone 11.25 mg<br>then Zoladex on<br>10/2016 | 2015-09-22         | 15 months then refused to<br>continue | Concomitant |
| 14       | 2015-09-17        | 2015-10-14        | 2015-12-04 | 2015-09-23 | 2016-01-20 | 119                              | Decapeptyl 22.5 mg                              | 2015-09-23         | 24                                    | Concomitant |
| 15       | 2015-10-16        | 2015-11-09        | 2015-12-31 | 2015-10-28 | 2016-02-03 | 98                               | Enantone 11.25 mg                               | 2015-10-28         | 18                                    | Concomitant |
| 16       | 2015-10-16        | 2015-11-12        | 2016-01-05 | 2015-10-21 | 2016-02-11 | 113                              | Enantone 30 mg                                  | 2015-10-21         | 24                                    | Concomitant |
| 17       | 2015-12-01        | 2016-01-18        | 2016-03-09 | 2015-12-02 | 2016-04-18 | 138                              | Enantone 30 mg                                  | 2015-12-02         | 12                                    | Concomitant |
| 18       | 2016-01-13        | 2016-02-18        | 2016-04-15 | 2016-02-18 | 2016-05-18 | 90                               | Enantone 30 mg                                  | 2016-01-13         | 36                                    | Concomitant |
| 19       | 2016-02-23        | 2016-03-10        | 2016-05-03 | 2016-03-10 | N/A        | N/A                              | Enantone 11.25 mg                               | 2016-02-24         | 12                                    | Concomitant |
| 20       | 2016-03-01        | Unknown           | Unknown    | 2016-03-01 | N/A        | N/A                              | Casodex 50 mg<br>Enantone 11,25 mg              | 2016-03-02         | Unknown                               | Unknown     |

|    |            |                |            |            |            |     |                                                      |                                        |               |             |
|----|------------|----------------|------------|------------|------------|-----|------------------------------------------------------|----------------------------------------|---------------|-------------|
| 21 | 2016-03-07 | 2016-03-16     | 2016-05-17 | 2016-03-02 | N/A        | N/A | Casodex 50 mg<br>Enantone 30 mg                      | 2016-03-02                             | 12            | Concomitant |
| 22 | 2016-03-23 | 2016-04-08     | 2016-06-03 | 2016-03-23 | N/A        | N/A | Enantone 30 mg                                       | 2016-03-23                             | 36            | Concomitant |
| 23 | 2016-04-07 | 2016-04-28     | 2016-06-28 | 2016-04-06 | 2016-08-02 | 118 | Enantone 11.25 mg                                    | 2016-04-06                             | 12            | Concomitant |
| 24 | 2016-06-29 | 2016-07-26     | 2016-09-20 | 2016-06-29 | 2016-11-02 | 126 | Enantone 11.25 mg                                    | 2016-06-29                             | 6             | Concomitant |
| 25 | 2016-10-11 | 2017-01-09     | 2017-03-01 | 2016-10-11 | 2017-03-29 | 169 | Enantone 30 mg<br>Casodex/placebo<br>ARN-509/placebo | 2017-11-08<br>2017-11-08<br>2016-10-17 | 36<br>4<br>36 | Concomitant |
| 26 | 2016-10-18 | Unknown        | Unknown    | 2016-10-18 | N/A        | N/A | Unknown                                              | Unknown                                | Unknown       | Unknown     |
| 27 | 2013-12-12 | 2014-08-07     | 2014-09-30 | 2013-12-12 | N/A        | N/A | Zoladex 10.8 mg                                      | 2013-12-18                             | 36            | Concomitant |
| 28 | 2013-12-12 | 2013-11-05     | 2014-01-03 | 2013-12-12 | N/A        | N/A | Eligard 45 mg                                        | 2013-12-18                             | 36            | Concomitant |
| 29 | 2013-12-12 | 2014-04-01     | 2014-05-27 | 2013-12-12 | 2014-06-30 | 200 | Diphereline 11.25 mg                                 | 2013-12-18                             | 36            | Concomitant |
| 30 | 2014-02-18 | 2014-07-23     | 2014-09-15 | 2014-02-18 | 2014-11-13 | 268 | Zoladex 10.8                                         | 2014-02-23                             | 36            | Concomitant |
| 31 | 2014-02-18 | 2014-06-06     | 2014-08-01 | 2014-02-18 | 2014-09-10 | 204 | Diphereline 11.25 mg                                 | 2014-02-23                             | 36            | Concomitant |
| 32 | 2014-02-18 | 2014-08-14     | 2014-09-29 | 2014-02-18 | N/A        | N/A | Eligard                                              | 2014-02-23                             | 36            | Concomitant |
| 33 | 2014-04-01 | 2014-08-11     | 2014-10-01 | 2014-04-01 | 2014-11-13 | 226 | Eligard 22.5 mg                                      | 2014-04-07                             | 36            | Concomitant |
| 34 | 2014-04-22 | 2014-07-18     | 2014-09-15 | 2014-04-22 | 2015-04-08 | 351 | Eligard 22.5 mg                                      | 2014-04-28                             | 36            | Concomitant |
| 35 | 2014-04-22 | 2014-07-18     | 2014-09-15 | 2014-04-22 | 2014-10-29 | 190 | Zoladex 10.8                                         | 2014-04-28                             | 36            | Concomitant |
| 36 | 2014-04-28 | 2014-08-04     | 2014-09-22 | 2014-04-28 | 2014-12-02 | 218 | Eligard 22.5 mg                                      | 2014-05-07                             | 36            | Concomitant |
| 37 | 2014-05-14 | 2014-08-29     | 2014-10-23 | 2014-05-14 | 2015-03-12 | 302 | Diphereline 11.25 mg                                 | 2014-05-20                             | 36            | Concomitant |
| 38 | 2014-05-28 | 2014-09-10     | 2014-10-23 | 2014-05-28 | 2014-12-09 | 195 | Eligard 22.5 mg                                      | 2014-06-07                             | 36            | Concomitant |
| 39 | 2014-05-28 | 2014-09-04     | 2014-10-15 | 2014-05-28 | 2014-12-09 | 195 | Eligard 22.5 mg                                      | 2014-06-07                             | 36            | Concomitant |
| 40 | 2014-05-28 | 2014-08-26     | 2014-10-16 | 2014-05-28 | 2014-12-16 | 202 | Diphereline 11.25 mg                                 | 2014-06-07                             | 36            | Concomitant |
| 41 | 2014-06-11 | 2014-09-17     | 2014-10-28 | 2014-06-11 | 2015-03-12 | 274 | Eligard 45 mg                                        | 2014-06-18                             | 36            | Concomitant |
| 42 | 2014-06-11 | 2014-09-16     | 2014-11-05 | 2014-06-11 | N/A        | N/A | Eligard 22.5 mg                                      | 2014-06-18                             | 36            | Concomitant |
| 43 | 2014-06-26 | 2014-10-06     | 2014-11-16 | 2014-06-26 | 2015-03-12 | 259 | Zoladex 10.8                                         | 2014-07-02                             | 36            | Concomitant |
| 44 | 2014-06-26 | 2014-10-03     | 2014-11-26 | 2014-06-26 | 2015-07-21 | 390 | Eligard 22.5 mg                                      | 2014-07-02                             | 36            | Concomitant |
| 45 | 2014-07-15 | 2014-10-17     | 2014-12-17 | 2014-07-15 | N/A        | N/A | Diphereline 11.25 mg                                 | 2014-07-20                             | 36            | Concomitant |
| 46 | 2014-08-13 | 2014-12-04     | 2015-01-27 | 2014-08-13 | 2015-07-21 | 342 | Eligard 22.5 mg                                      | 2014-08-20                             | 36            | Concomitant |
| 47 | 2014-08-13 | died before RT | 2014-08-13 | N/A        | N/A        | N/A | Diphereline 11.25 mg                                 | 2014-08-20                             | 36            | Concomitant |
| 48 | 2014-09-02 | 2015-12-30     | 2015-03-18 | 2014-09-02 | 2015-07-21 | 322 | Diphereline 11.25 mg                                 | 2014-09-09                             | 36            | Concomitant |
| 49 | 2014-09-02 | 2015-01-12     | 2015-03-05 | 2014-09-02 | 2015-07-21 | 322 | Eligard 45 mg                                        | 2014-09-09                             | 36            | Concomitant |
| 50 | 2014-09-10 | 2014-12-29     | 2015-02-28 | 2014-09-10 | 2015-07-13 | 306 | Zoladex 10.8 mg                                      | 2014-09-17                             | 36            | Concomitant |
| 51 | 2014-09-10 | 2014-12-19     | 2015-02-13 | 2014-09-10 | 2015-08-27 | 351 | Zoladex 10.8 mg                                      | 2014-09-17                             | 36            | Concomitant |
| 52 | 2014-09-30 | 2015-01-16     | 2015-03-30 | 2014-09-30 | 2015-08-27 | 331 | Diphereline 11.25 mg                                 | 2014-10-06                             | 36            | Concomitant |
| 53 | 2014-10-20 | 2015-01-28     | 2015-03-19 | 2014-10-20 | 2015-09-16 | 331 | Zoladex 10.8 mg                                      | 2014-10-27                             | 36            | Concomitant |
| 54 | 2014-10-20 | 2015-02-16     | 2015-04-17 | 2014-10-20 | N/A        | N/A | Zoladex 10.8 mg                                      | 2014-10-27                             | 36            | Concomitant |
| 55 | 2014-10-20 | no RT          | 2014-10-20 | N/A        | N/A        | N/A | Firmagon                                             | 2014-10-27                             | 36            | Concomitant |
| 56 | 2014-10-29 | no RT          | 2014-10-29 | N/A        | N/A        | N/A | no ET                                                | N/A                                    | 36            | Concomitant |
| 57 | 2014-11-13 | 2015-02-17     | 2015-05-15 | 2014-11-13 | 2015-07-22 | 251 | Diphereline 11.25 mg                                 | 2014-11-20                             | 36            | Concomitant |

|    |            |                         |            |            |            |     |                      |            |    |             |
|----|------------|-------------------------|------------|------------|------------|-----|----------------------|------------|----|-------------|
| 58 | 2014-12-02 | 2015-02-16              | 2015-04-09 | 2014-12-02 | 2015-07-08 | 218 | Zoladex 10.8 mg      | 2014-12-09 | 36 | Concomitant |
| 59 | 2014-12-02 | 2015-03-16              | 2015-04-22 | 2014-12-02 | 2015-09-03 | 275 | Diphereline 11.25 mg | 2014-12-09 | 36 | Concomitant |
| 60 | 2014-12-16 | 2015-03-31              | 2015-05-21 | 2014-12-16 | 2015-09-06 | 264 | Zoladex 10.8 mg      | 2014-12-22 | 36 | Concomitant |
| 61 | 2015-02-17 | 2015-05-29              | 2015-07-27 | 2015-02-17 | 2015-10-28 | 253 | Lucrin 3.75 mg       | 2015-02-24 | 36 | Concomitant |
| 62 | 2017-02-17 | 2015-08-25              | 2015-10-14 | 2015-02-17 | 2015-11-03 | 259 | Eligard 22.5 mg      | 2017-02-24 | 36 | Concomitant |
| 63 | 2015-03-10 | 2015-05-06              | 2015-06-17 | 2015-03-10 | N/A        | N/A | Zoladex 10.8 mg      | 2015-03-17 | 36 | Concomitant |
| 64 | 2015-03-10 | 2015-07-24              | 2015-09-16 | 2015-03-10 | 2015-11-24 | 259 | Diphereline 11.25 mg | 2015-03-17 | 36 | Concomitant |
| 65 | 2015-03-30 | 2015-09-18              | 2015-10-05 | 2015-03-30 | N/A        | N/A | Eligard 22.5 mg      | 2015-04-07 | 36 | Concomitant |
| 66 | 2015-03-30 | 2015-05-28              | 2015-07-08 | 2015-03-30 | 2015-10-20 | 204 | Diphereline 11.25 mg | 2015-04-07 | 36 | Concomitant |
| 67 | 2015-03-30 | 2015-07-07              | 2015-09-03 | 2015-03-30 | 2015-11-24 | 239 | Diphereline 11.25 mg | 2015-04-07 | 36 | Concomitant |
| 68 | 2015-04-07 | 2015-05-25              | 2015-07-06 | 2015-04-07 | 2015-12-01 | 238 | Diphereline 11.25 mg | 2015-04-14 | 36 | Concomitant |
| 69 | 2015-04-29 | 2015-08-27              | 2015-10-24 | 2015-04-29 | 2016-05-18 | 385 | Diphereline 11.25 mg | 2015-05-05 | 36 | Concomitant |
| 70 | 2015-05-05 | 2015-08-25              | 2015-10-28 | 2015-05-05 | 2016-02-02 | 273 | Diphereline 11.25 mg | 2015-05-12 | 36 | Concomitant |
| 71 | 2015-05-13 | 2015-06-29              | 2015-07-31 | 2015-05-13 | 2016-02-02 | 265 | Zoladex 10.8 mg      | 2015-05-20 | 36 | Concomitant |
| 72 | 2015-05-26 | no RT                   |            | 2015-05-26 | N/A        | N/A | no ET                | N/A        | 36 | Concomitant |
| 73 | 2015-05-26 | 2015-09-04              | 2015-11-09 | 2015-05-26 | 2016-05-18 | 358 | Eligard 22.5 mg      | 2015-06-03 | 36 | Concomitant |
| 74 | 2015-07-06 | 2016-01-11              | 2016-02-17 | 2015-07-06 | 2017-02-21 | 596 | Zoladex 10.8 mg      | 2015-07-13 | 36 | Concomitant |
| 75 | 2015-07-06 | 2015-09-11              | 2015-11-14 | 2015-07-06 | 2017-02-21 | 596 | Eligard 22.5 mg      | 2015-07-13 | 36 | Concomitant |
| 76 | 2015-08-19 | no RT                   |            | 2015-08-19 | 2017-02-21 | 552 | Zoladex 10.8 mg      | 2015-08-26 | 36 | Concomitant |
| 77 | 2015-09-10 | 2016-01-07              | 2016-03-04 | 2015-09-10 | N/A        | N/A | Zoladex 10.8 mg      | 2015-09-17 | 36 | Concomitant |
| 78 | 2015-09-10 | no RT                   |            | 2015-09-10 | N/A        | N/A | no ET                | N/A        | 36 | Concomitant |
| 79 | 2015-09-17 | 2015-12-22              | 2016-02-24 | 2015-09-17 | 2017-02-21 | 523 | Diphereline 11.25 mg | 2015-09-24 | 36 | Concomitant |
| 80 | 2015-10-08 | 2016-01-29              | 2016-04-06 | 2015-10-08 | N/A        | N/A | Eligard 22.5 mg      | 2015-10-15 | 36 | Concomitant |
| 81 | 2015-10-08 | no RT                   |            | 2015-10-08 | N/A        | N/A | Eligard 22.5 mg      | 2015-10-15 | 36 | Concomitant |
| 82 | 2015-10-13 | 2016-02-16              | 2016-04-27 | 2015-10-13 | 2016-05-18 | 218 | Eligard 22.5 mg      | 2015-10-20 | 36 | Concomitant |
| 83 | 2015-10-20 | no RT                   |            | 2015-10-20 | N/A        | N/A | Eligard 22.5 mg      | 2015-10-27 | 36 | Concomitant |
| 84 | 2015-10-28 | no RT                   |            | 2015-10-28 | N/A        | N/A | no ET                | N/A        | 36 | Concomitant |
| 85 | 2015-10-28 | no RT                   |            | 2015-10-28 | 2017-03-21 | 510 | Zoladex 10.8 mg      | 2015-11-04 | 36 | Concomitant |
| 86 | 2015-10-28 | 2016-02-09              | 2016-04-12 | 2015-10-28 | 2017-03-21 | 510 | Zoladex 10.8 mg      | 2015-11-04 | 36 | Concomitant |
| 87 | 2015-11-03 | no RT                   |            | 2015-11-03 | N/A        | N/A | Eligard 22.5 mg      | 2015-11-10 | 36 | Concomitant |
| 88 | 2015-11-24 | 2016-04-05              | 2016-06-15 | 2015-11-24 | N/A        | N/A | Zoladex 10.8 mg      | 2015-12-01 | 36 | Concomitant |
| 89 | 2015-12-01 | no RT, nodes metastasis |            | 2015-12-01 | N/A        | N/A | Eligard 45 mg        | 2015-12-08 | 36 | Concomitant |
| 90 | 2015-12-01 | 2016-03-08              | 2016-04-11 | 2015-12-01 | N/A        | N/A | Eligard 45 mg        | 2015-12-08 | 36 | Concomitant |
| 91 | 2016-01-14 | no RT                   |            | 2016-01-14 | N/A        | N/A | Diphereline 11.25 mg | 2016-01-21 | 36 | Concomitant |
| 92 | 2016-01-14 | Cyberknife              |            | 2016-01-14 | N/A        | N/A | Eligard 22.5 mg      | 2016-01-21 | 36 | Concomitant |
| 93 | 2016-01-14 | 2016-03-09              | 2016-04-20 | 2016-01-14 | 2017-03-21 | 432 | Eligard 45 mg        | 2016-01-22 | 36 | Concomitant |
| 94 | 2016-01-25 | no RT                   |            | 2016-01-25 | N/A        | N/A | Diphereline 11.25 mg | 2016-02-03 | 36 | Concomitant |
| 95 | 2016-01-25 | no RT, nodes metastasis |            | 2016-01-25 | N/A        | N/A | Diphereline 11.25 mg | 2016-02-03 | 36 | Concomitant |
| 96 | 2016-01-25 | 2016-02-26              | 2016-05-18 | 2016-01-25 | N/A        | N/A | Diphereline 11.25 mg | 2016-02-03 | 36 | Concomitant |

|     |            |            |            |            |            |     |                      |            |    |             |
|-----|------------|------------|------------|------------|------------|-----|----------------------|------------|----|-------------|
| 97  | 2016-02-08 | 2016-03-27 | 2016-05-20 | 2016-02-08 | N/A        | N/A | Eligard 22.5 mg      | 2016-02-16 | 36 | Concomitant |
| 98  | 2016-02-15 | 2016-04-25 | 2016-06-15 | 2016-02-15 | N/A        | N/A | Zoladex 10.8 mg      | 2016-02-22 | 36 | Concomitant |
| 99  | 2016-02-15 | 2014-01-29 | 2014-03-28 | 2016-02-15 | N/A        | N/A | Diphereline 11.25 mg | 2016-02-22 | 36 | Concomitant |
| 100 | 2016-02-23 | 2016-04-07 | 2016-05-31 | 2016-02-23 | N/A        | N/A | Zoladex 10.8 mg      | 2016-03-02 | 36 | Concomitant |
| 101 | 2016-03-16 | 2016-05-16 | 2016-06-29 | 2016-03-16 | 2017-03-21 | 370 | Eligard 22.5 mg      | 2016-03-23 | 36 | Concomitant |
| 102 | 2016-03-23 | 2016-05-16 | 2016-09-15 | 2016-03-23 | N/A        | N/A | Eligard 22.5 mg      | 2016-03-30 | 36 | Concomitant |
| 103 | 2016-03-29 | 2016-09-08 | 2016-11-04 | 2016-03-29 | N/A        | N/A | Diphereline 11.25 mg | 2016-04-05 | 36 | Concomitant |
| 104 | 2016-03-31 | 2016-07-07 | 2016-09-08 | 2016-03-31 | N/A        | N/A | Diphereline 11.25 mg | 2016-04-07 | 36 | Concomitant |
| 105 | 2016-03-31 | 2016-09-08 | 2016-11-02 | 2016-03-31 | N/A        | N/A | Zoladex 10.8 mg      | 2016-04-07 | 36 | Concomitant |
| 106 | 2016-04-06 | 2016-09-07 | 2016-11-05 | 2016-04-06 | 2017-03-21 | 349 | Diphereline 11.25 mg | 2016-04-13 | 36 | Concomitant |
| 107 | 2016-04-13 | 2016-07-08 | 2016-09-22 | 2016-04-13 | N/A        | N/A | Eligard 22.5 mg      | 2016-04-20 | 36 | Concomitant |
| 108 | 2016-04-13 | 2016-08-05 | 2016-09-28 | 2016-04-13 | N/A        | N/A | Diphereline 11.25 mg | 2016-04-20 | 36 | Concomitant |
| 109 | 2016-04-20 | 2016-08-05 | 2016-09-27 | 2016-04-20 | 2017-03-28 | 342 | Eligard 22.5 mg      | 2016-04-27 | 36 | Concomitant |
| 110 | 2016-04-20 | 2016-08-01 | 2016-09-30 | 2016-04-20 | 2017-03-21 | 335 | Firmagon 80 mg       | 2016-04-27 | 36 | Concomitant |
| 111 | 2016-04-28 | 2016-07-29 | 2016-09-21 | 2016-04-28 | 2017-02-28 | 306 | Eligard 22.5 mg      | 2016-05-06 | 36 | Concomitant |
| 112 | 2016-04-28 | no RT      | 2016-04-28 | 2017-03-07 |            | 313 | no ET                | N/A        | 36 | Concomitant |
| 113 | 2016-04-28 | no RT      | 2016-04-28 | 2017-03-07 |            | 313 | Diphereline 11.25    | 2016-05-06 | 36 | Concomitant |
| 114 | 2016-05-26 | metastasis | 2016-05-26 | N/A        | N/A        |     | Eligard 22.5 mg      | 2016-06-04 | 36 | Concomitant |
| 115 | 2016-06-07 | metastasis | 2016-06-07 | N/A        | N/A        |     | Eligard 22.5 mg      | 2016-06-13 | 36 | Concomitant |
| 116 | 2016-07-05 | metastasis | 2016-07-05 | N/A        | N/A        |     | Diphereline 11.25 mg | 2016-07-12 | 36 | Concomitant |
| 117 | 2016-07-18 | 2016-04-20 | 2016-05-24 | 2016-07-18 | N/A        | N/A | Diphereline 11.25 mg | 2016-07-25 | 36 | Concomitant |
| 118 | 2016-07-18 | 2016-09-23 | 2016-11-23 | 2016-07-18 | N/A        | N/A | Eligard 22.5 mg      | 2016-07-25 | 36 | Concomitant |
| 119 | 2016-07-18 | metastasis | 2016-07-18 | N/A        | N/A        |     | Eligard 22.5 mg      | 2016-07-25 | 36 | Concomitant |
| 120 | 2016-07-18 | metastasis | 2016-07-18 | N/A        | N/A        |     | Diphereline 11.25 mg | 2016-07-25 | 36 | Concomitant |
| 121 | 2016-08-02 | metastasis | 2016-08-02 | N/A        | N/A        |     | no ET                | N/A        | 36 | Concomitant |
| 122 | 2016-08-16 | 2016-10-13 | 2016-12-15 | 2016-08-16 | 2017-03-28 | 224 | Zoladex 10.8 mg      | 2016-08-23 | 36 | Concomitant |
| 123 | 2016-09-20 | 2016-12-15 | 2017-01-17 | 2016-09-20 | 2017-03-28 | 189 | Reseligo 10.8 mg     | 2016-09-27 | 36 | Concomitant |
| 124 | 2016-09-20 | 2017-06-12 | 2017-08-04 | 2016-09-20 | N/A        | N/A | Diphereline 11.25 mg | 2016-09-27 | 36 | Concomitant |
| 125 | 2016-10-04 | metastasis | 2016-10-04 | N/A        | N/A        |     | Firmagon 80 mg       | 2016-10-11 | 36 | Concomitant |
| 126 | 2016-10-04 | 2017-03-21 | 2017-05-24 | 2016-10-04 | N/A        | N/A | Diphereline 11.25 mg | 2016-10-11 | 36 | Concomitant |
| 127 | 2016-10-18 | no RT      | 2016-10-18 | N/A        | N/A        |     | Diphereline 11.25 mg | 2016-10-25 | 36 | Concomitant |
| 128 | 2016-11-08 | 2017-01-30 | 2017-04-03 | 2016-11-08 | N/A        | N/A | Diphereline 11.25 mg | 2016-11-15 | 36 | Concomitant |
| 129 | 2016-11-08 | 2017-03-28 | 2017-05-19 | 2016-11-08 | N/A        | N/A | Diphereline 11.25 mg | 2016-11-15 | 36 | Concomitant |
| 130 | 2016-11-29 | 2017-03-14 | 2017-04-20 | 2016-11-29 | N/A        | N/A | Eligard 22.5 mg      | 2016-12-05 | 36 | Concomitant |
| 131 | 2016-11-29 | 2017-03-06 | 2017-04-28 | 2016-11-29 | N/A        | N/A | Eligard 45 mg        | 2016-12-05 | 36 | Concomitant |

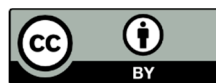

© 2019 by the authors. Licensee MDPI, Basel, Switzerland. This article is an open access article distributed under the terms and conditions of the Creative Commons Attribution (CC BY) license (<http://creativecommons.org/licenses/by/4.0/>).
